# Supplementary material for: Vanadium disulfide-incorporated polymer nanocomposites for flexible piezoelectric energy generators and road safety sensors
Source: Royal Society of Chemistry journal article supplement (doi:10.1039/d3ta07335a), 2024-01-01
Supplement: d3ta07335a8.pdf [file d3ta07335a8.pdf]

## Electronic Supplementary Information

### **Vanadium disulfide incorporated polymer nanocomposite for flexible piezoelectric energy generators and road safety sensors**

**Ankur Verma<sup>a</sup>, Arjun Hari M.<sup>b</sup>, Subash Cherumannil Karumuthil<sup>\*a,c</sup>**

*<sup>a</sup> Center for Nano and Soft Matter Sciences, Bengaluru, 562162, India*

*<sup>b</sup> Department of Electronic and Communication Engineering, National Institute of Technology, Calicut, 673601, India*

*<sup>c</sup>Academy of Scientific and Innovation Research (AcSIR), Ghaziabad UttarPradesh, 201002, India*

\*Corresponding author E-mail address: [cksubash@cens.res.in](mailto:cksubash@cens.res.in), [cksubash2020@gmail.com](mailto:cksubash2020@gmail.com)

| Supplementary file number | Details                                                                                                 | Page number |
|---------------------------|---------------------------------------------------------------------------------------------------------|-------------|
| S1                        | FESEM image of exfoliated VS <sub>2</sub> sheets and TEM image of VS <sub>2</sub> .                     | 3           |
| S2                        | Size parameters of flexible electrodes and polymer nanocomposite film of small devices.                 | 4           |
| S3                        | Size parameters and flexibility of the film and electrode of big device.                                | 5           |
| S4                        | FESEM images of pure and nanocomposite polymer films.                                                   | 6           |
| S5                        | Percentage of $\beta$ -phase calculated for polymer nanocomposite films.                                | 7           |
| S6                        | XRD analysis of polymer nanocomposite films                                                             | 8           |
| S7                        | Higher magnification FESEM image of P/Vs <sub>2</sub> (1) polymer nanocomposite.                        | 9           |
| S8                        | Zeta potential analysis of VS <sub>2</sub> /DMF solution.                                               | 10          |
| S9                        | PFM analysis of PVDF and P/Vs <sub>2</sub> (0.25).                                                      | 11          |
| S10                       | Programming code of FSR with block diagram of setup.                                                    | 12          |
| S11                       | Complete setup of optimisation of force at particular rpm of tapping machine.                           | 13          |
| S12                       | Error bar graph of output of small device                                                               | 14          |
| S13                       | Cycle stability of prototype                                                                            | 15          |
| S14                       | Programming code for road safety system with lab scale setup of alert display operated by piezo-sensor. | 16          |
| S15                       | Programme coding and lab scale setup of smart door operated by piezo-sensor.                            | 17          |
| S16                       | Supplementary videos                                                                                    | 18          |

Supplementary file number –S1

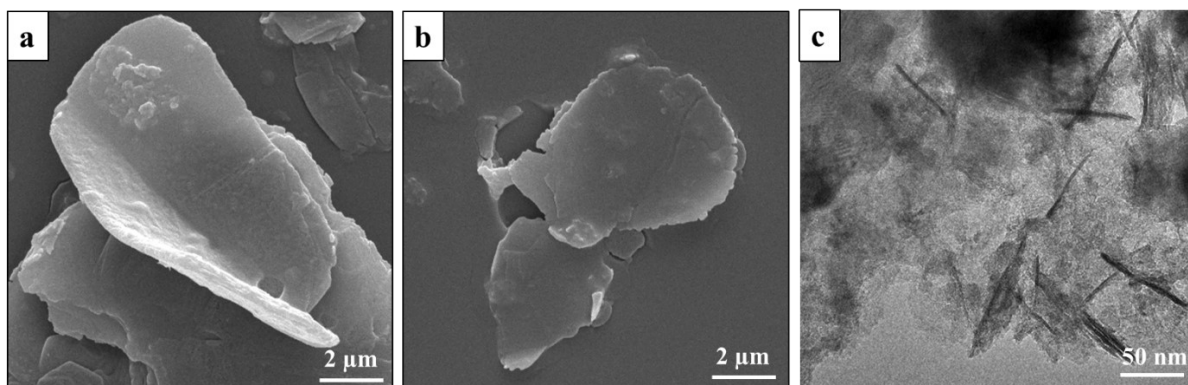

Figure S1. FESEM image of exfoliated layers of VS<sub>2</sub> (a) and (b) at different regions. (c) TEM image of layers structure of VS<sub>2</sub>.

Supplementary file number –S2

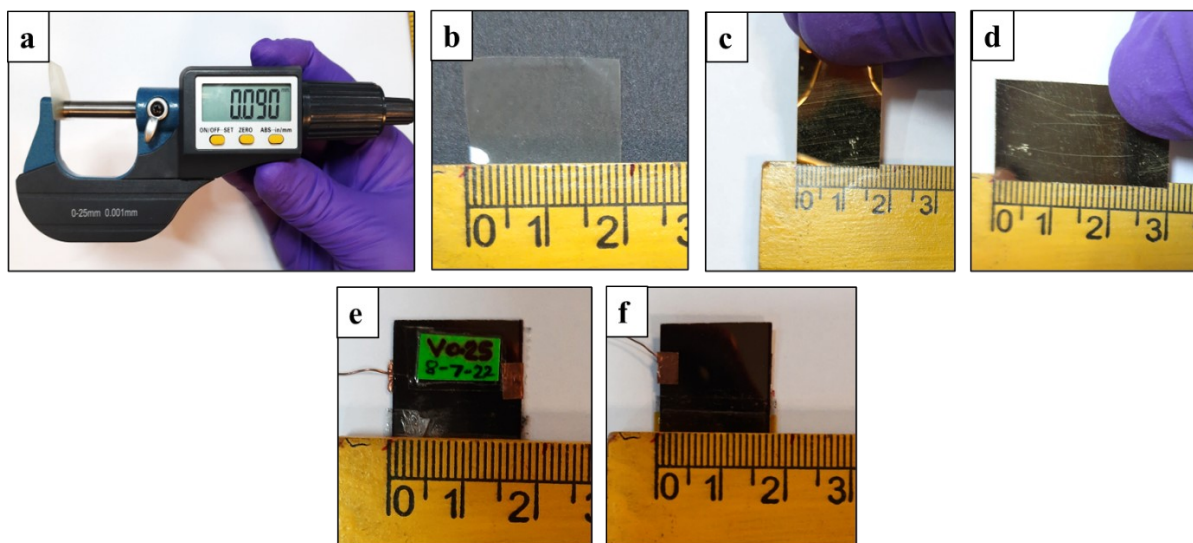

Figure S2. Parameters of flexible electrodes and polymer nanocomposite film of small devices. (a) and (b) thickness of 90  $\mu\text{m}$  and size 2 cm  $\times$  2 cm. (c), (d), (e) and (f) length and breadth of the electrode (1.9  $\times$  3 cm) and final device.

Supplementary file number –S3

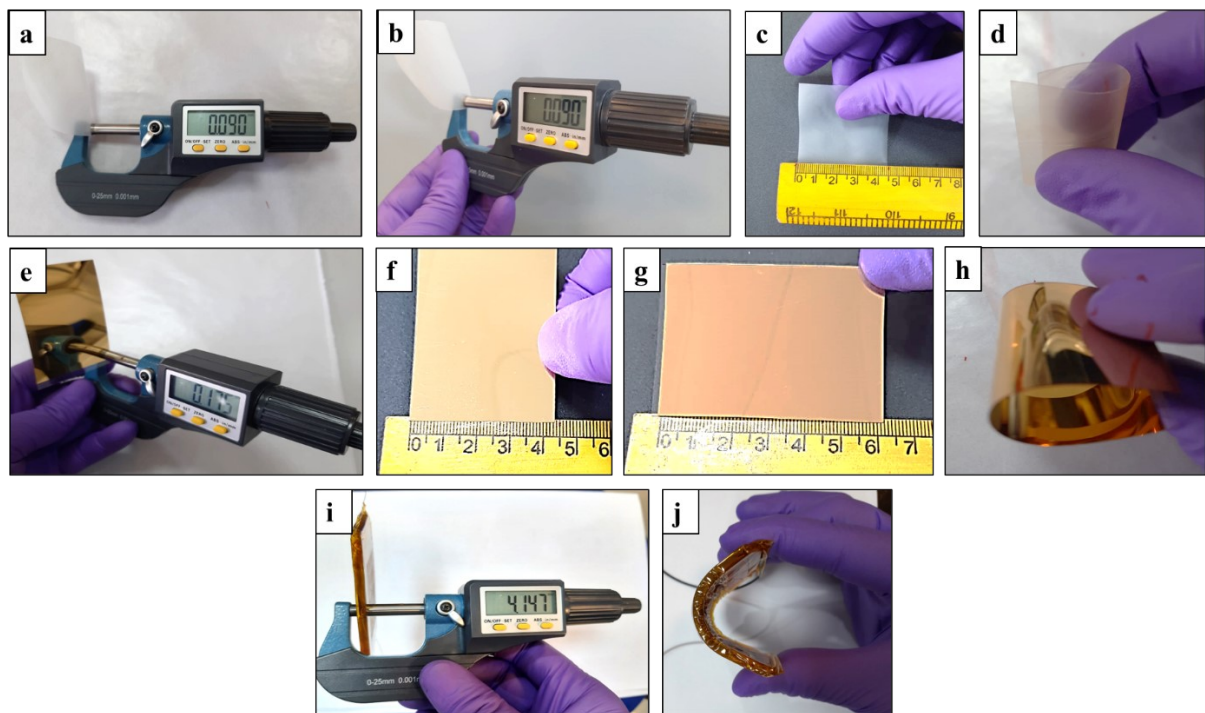

Figure S3. The size, thickness parameters and flexibility of the film and electrode of the big device. In addition, the thickness and bendability of the PDMS encapsulated prototype device. (a), (b), (c) and (d) parameters of polymer nanocomposite film. (e), (f), (g) and (h) parameters of the electrode. The thickness and bendability of the prototype in (i) and (j).

Supplementary file number –S4

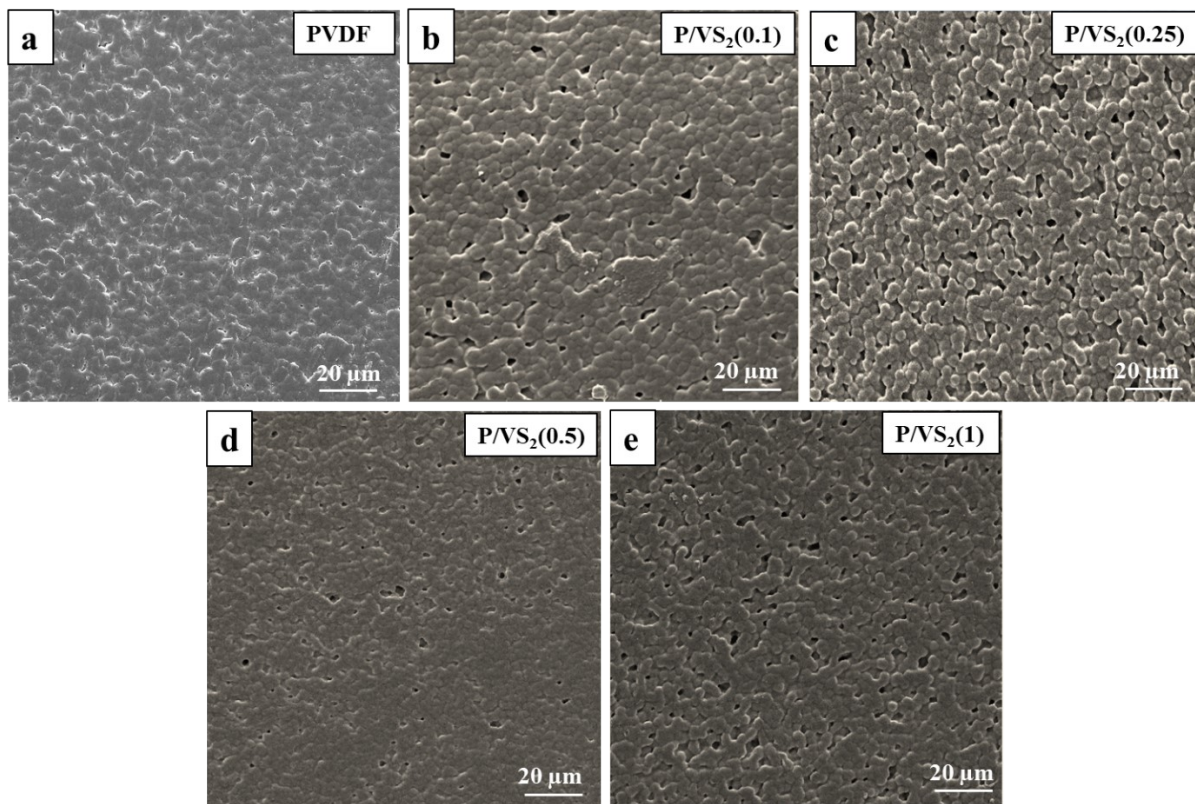

Figure S4. FESEM images of pure and nanocomposite polymer films.

## Supplementary file number –S5

Table S5. Fraction of  $\beta$ -phase calculated for polymer nanocomposite films.

| Sample Name              | $A_{\alpha}$ (at 766 $\text{cm}^{-1}$ ) | $A_{\beta}$ (at 839 $\text{cm}^{-1}$ ) | Percentage of $\beta$ -phase =<br>$[A_{\beta}/(1.26 \times A_{\alpha}) + A_{\beta}] \times 100$ |
|--------------------------|-----------------------------------------|----------------------------------------|-------------------------------------------------------------------------------------------------|
| PVDF                     | 0.00038                                 | 0.0067                                 | 93.33%                                                                                          |
| P/VS <sub>2</sub> (0.1)  | 0.00037                                 | 0.0074                                 | 94.07%                                                                                          |
| P/VS <sub>2</sub> (0.25) | 0.0004                                  | 0.0413                                 | 98.79%                                                                                          |
| P/VS <sub>2</sub> (0.5)  | 0.0008                                  | 0.0324                                 | 96.98%                                                                                          |
| P/VS <sub>2</sub> (1)    | 0.0004                                  | 0.0168                                 | 97%                                                                                             |

The percentage of polar  $\beta$ -phase of the polymer films were calculated using the following equation by assuming the IR absorption follows Lambert-Beer law. Where  $A_{\alpha}$  and  $A_{\beta}$  are the absorbance at 766  $\text{cm}^{-1}$  and at 839  $\text{cm}^{-1}$ , respectively

$$\text{Fraction of } \beta\text{-phase} = [A_{\beta}/(1.26 \times A_{\alpha}) + A_{\beta}] \times 100$$

Supplementary file number –S6

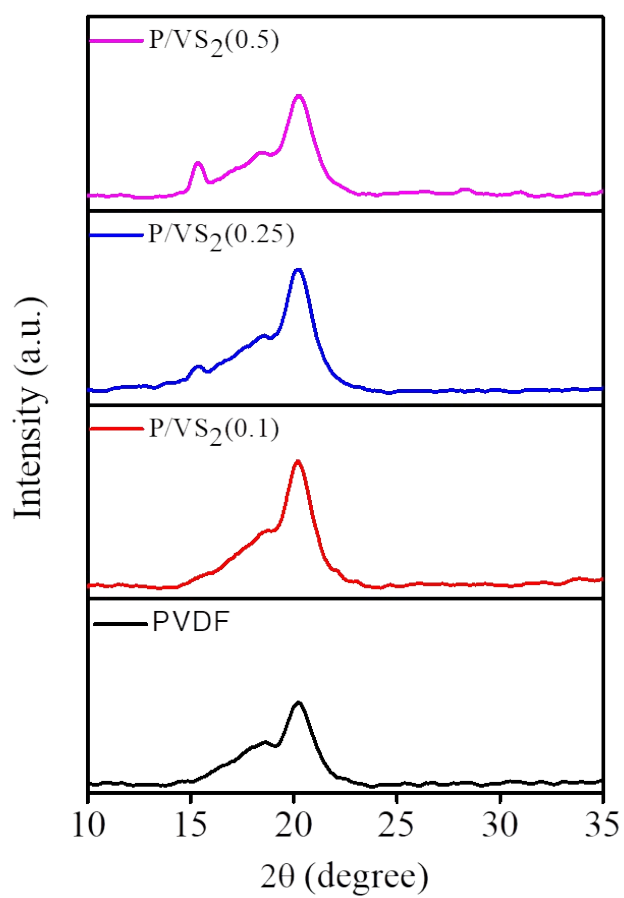

Figure S6. XRD analysis of polymer nanocomposite films.



Supplementary file number –S7

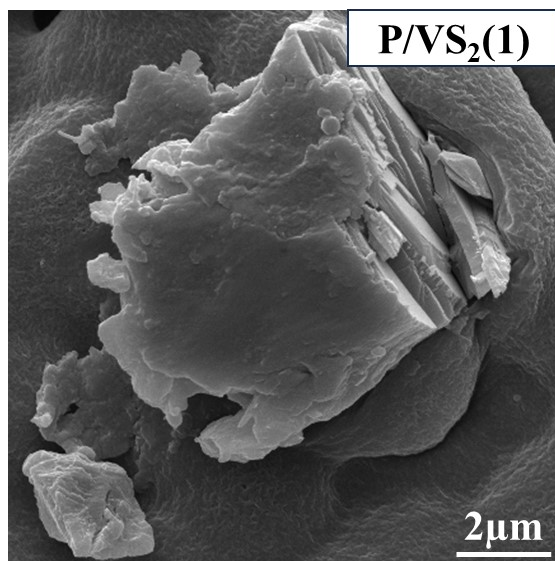

Figure S7. Higher magnification FESEM image of P/VS<sub>2</sub>(1) polymer nanocomposite.

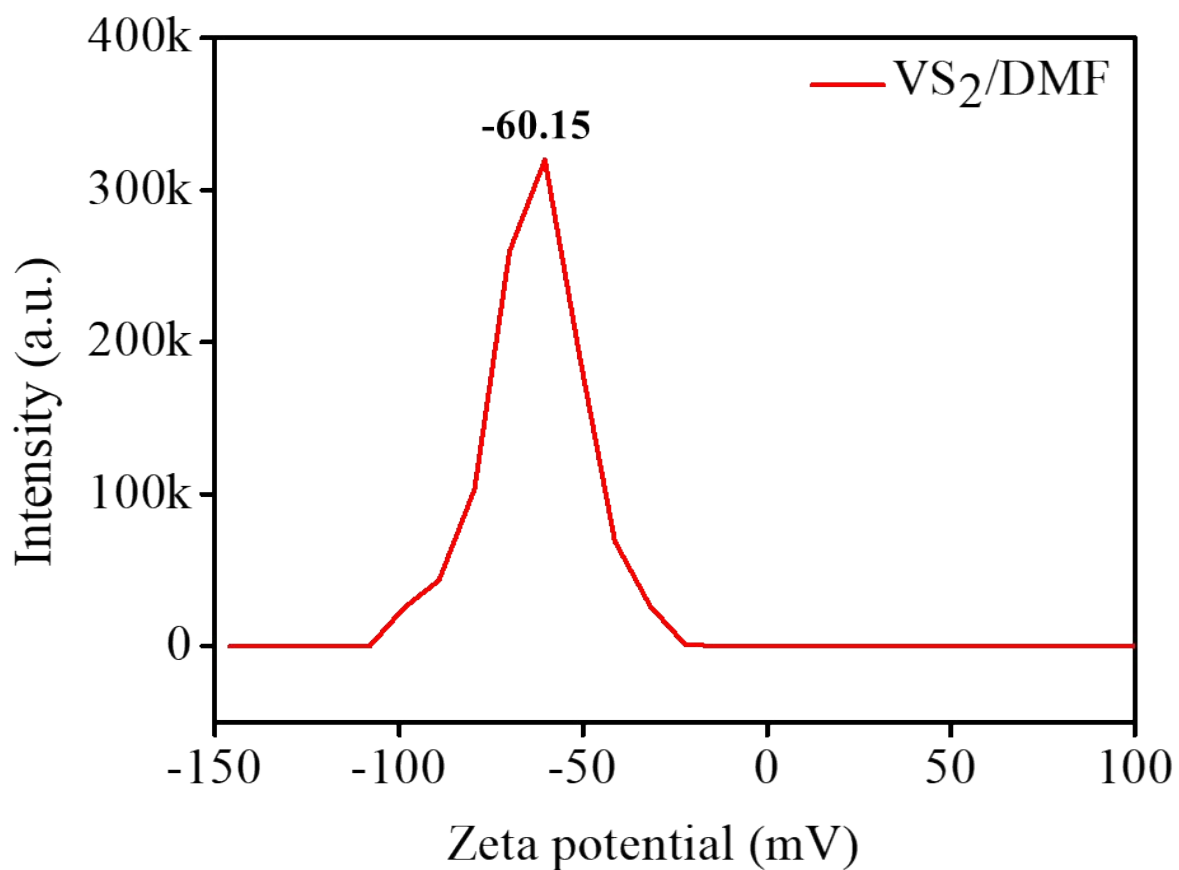

Figure S8. Zeta potential analysis of the VS<sub>2</sub>/DMF solution. This peak at -60.15 represents the overall surface charge of VS<sub>2</sub> layers, which may be the reason for the enhanced  $\beta$  phase of PVDF.

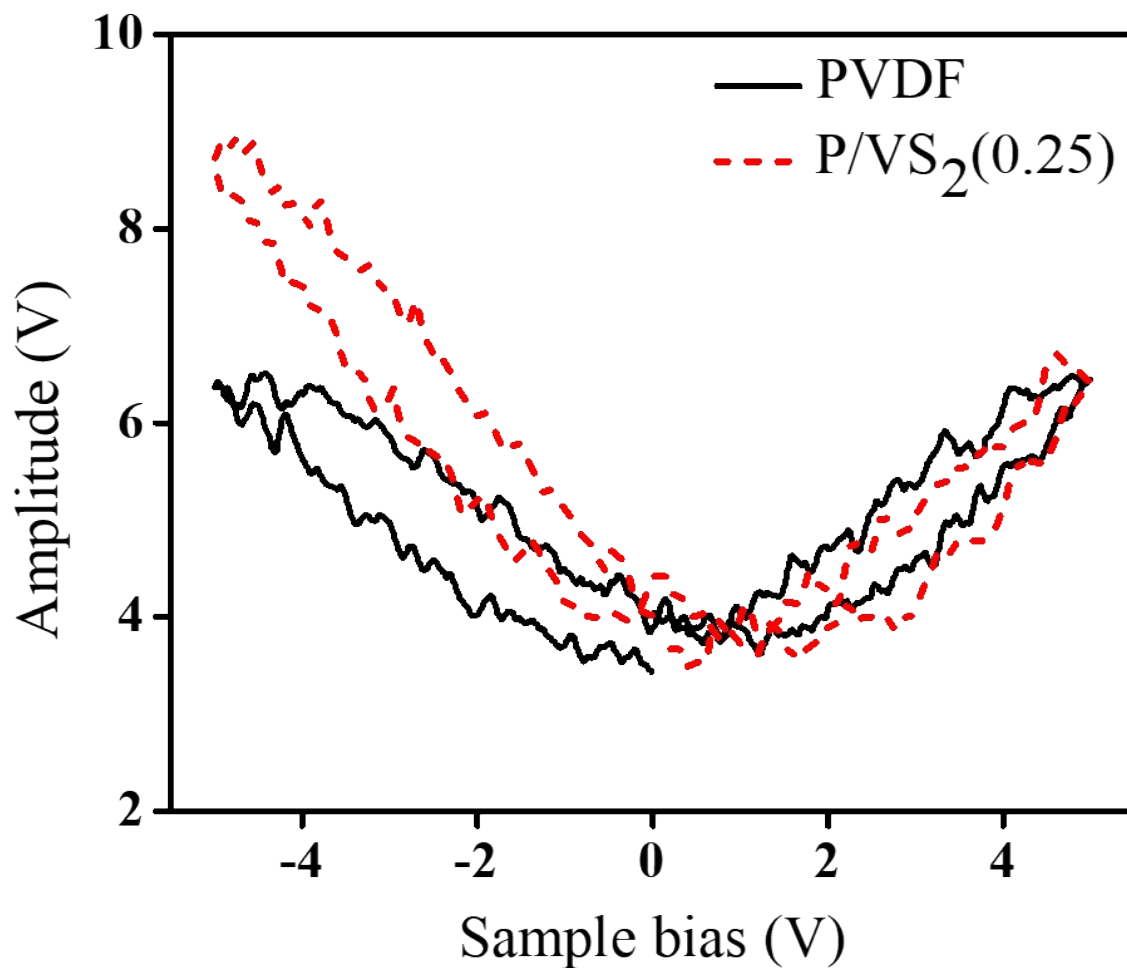

Figure S9. Ferroelectric butterfly loop taken by using PFM analysis of PVDF and P/VS<sub>2</sub>(0.25).

## Supplementary file number –S10

### Force Sensitive Resistance (FSR)

```
#include "LiquidCrystal.h"
LiquidCrystal lcd(8,7,6,5,4,3);

int Force_VAL = 0;

void setup()
{
  pinMode(A0, INPUT);
  Serial.begin(9600);
  lcd.begin(16,2);

  lcd.setCursor(0,0);
  lcd.print("Force Sensor VALUE");

  pinMode(11, OUTPUT);
}

void loop()
{
  Force_VAL = analogRead(A0);
  Serial.println(Force_VAL);

  lcd.setCursor(0,1);
  lcd.print(Force_VAL);

  if (Force_VAL > 100)
  {
    digitalWrite(11, HIGH);
  }
  else
  {
    digitalWrite(11, LOW);
  }

  delay(10); // Delay a little bit to
  improve simulation performance
}
```

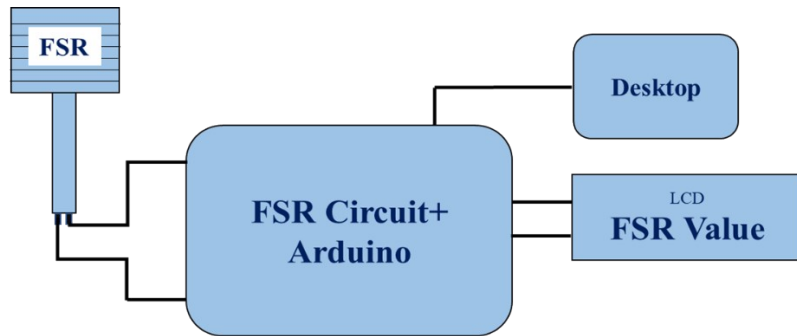

Figure S10. Programming code of FSR on left side and block diagram of full setup of FSR and circuit on right side.

Supplementary file number –S11

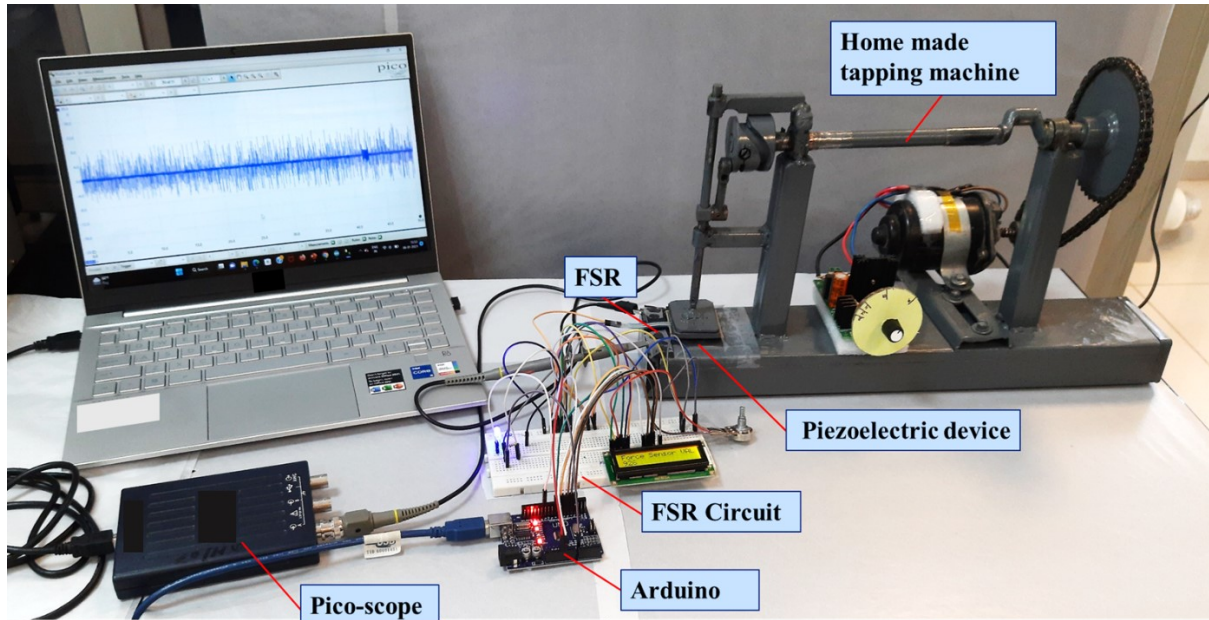

Figure S11. Complete setup of optimisation of force at particular rpm of tapping machine and taking output voltage of the device.

Supplementary file number –S12

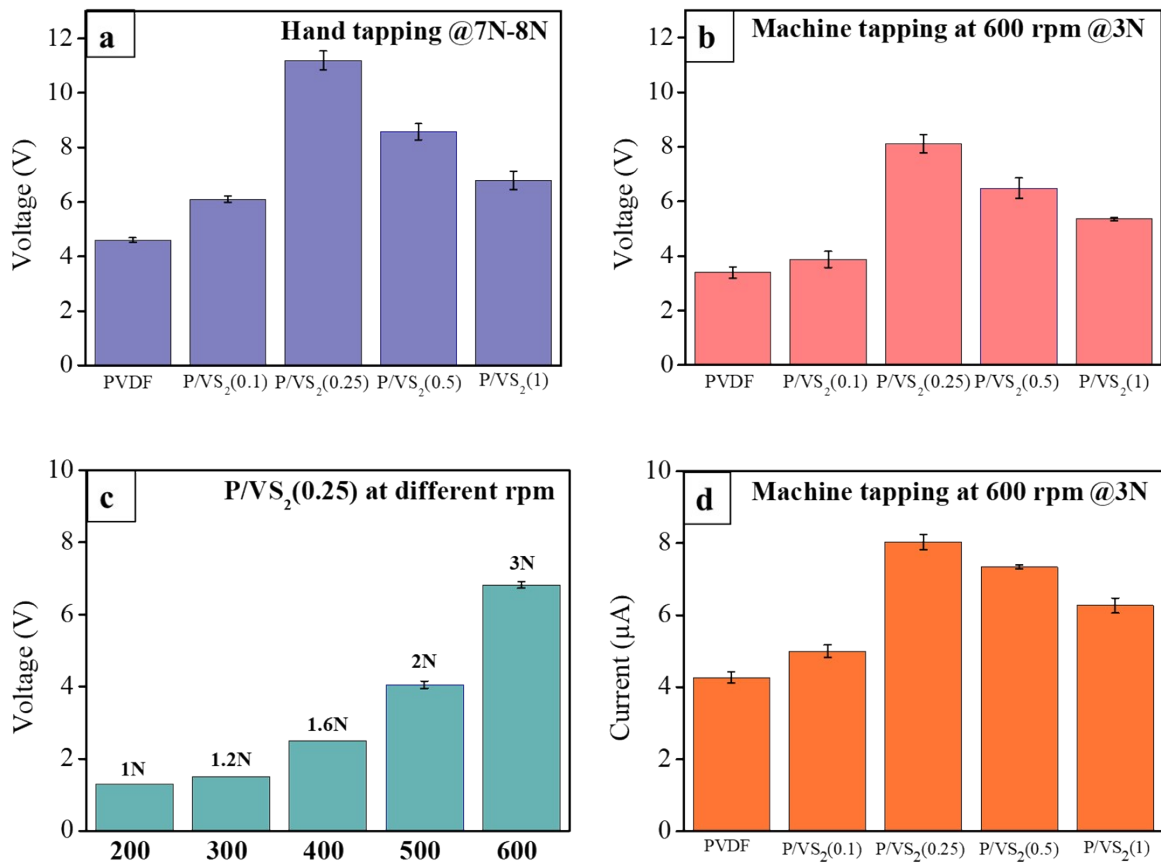

Figure S12. Error bar graph of the output of small devices. (a) and (b) voltage output of Pure PVDF and different concentrated small device by hand tapping and machine tapping at 600 rpm @3N force. (c) P/VS<sub>2</sub>(0.25) voltage output by machine tapping at different rpm. (d) current output of different device by machine tapping at 600 rpm.

Supplementary file number –S13

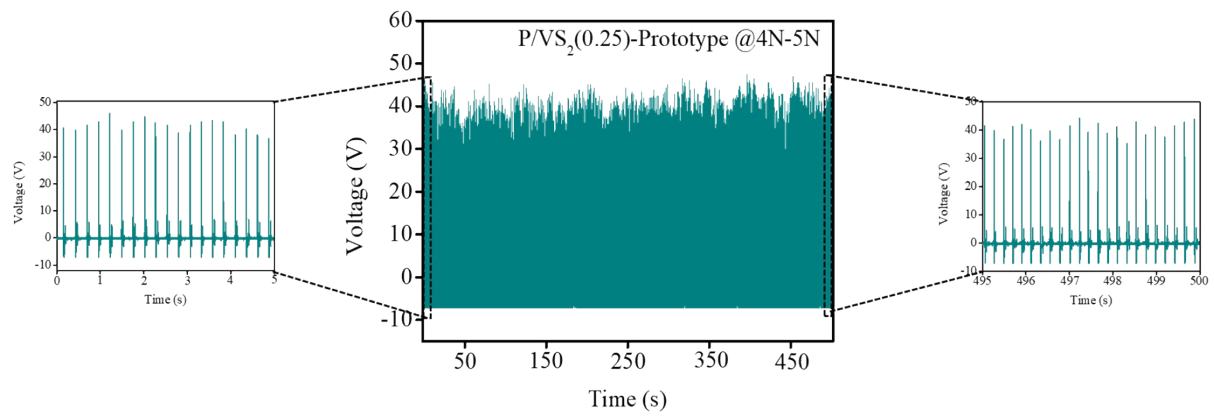

Figure S13. Cycle stability of prototype with hand tapping by giving 4N-5N force continuously for up to 500 seconds.

## Supplementary file number –S14

```
#include "LiquidCrystal.h"
LiquidCrystal lcd(8, 9, 4, 5, 6, 7);
float input_voltage = 0.0;
float temp=0.0;

void setup()
{
  Serial.begin(9600); // opens serial port, sets data rate to 9600 bps
  lcd.begin(16, 2); // set up the LCD's number of columns and rows:
  lcd.print("CeNS ");
}
void loop()
{
  //Conversion formula for voltage
  int analog_value = analogRead(A0);
  input_voltage = (analog_value * 5.0) / 1023.0;

  if (input_voltage <4.0 )
  {
    Serial.print("v= ");
    Serial.println(input_voltage);
    lcd.setCursor(1, 1);
    lcd.print("No Vehicle");

    delay(5000);
  }
  else if(input_voltage >4.1 & input_voltage <5.0)
  {
    Serial.print("v= ");
    Serial.println(input_voltage);
    lcd.setCursor(0, 1);
    lcd.print("Alert Vehicle");

    delay(1000);
  }
}
```

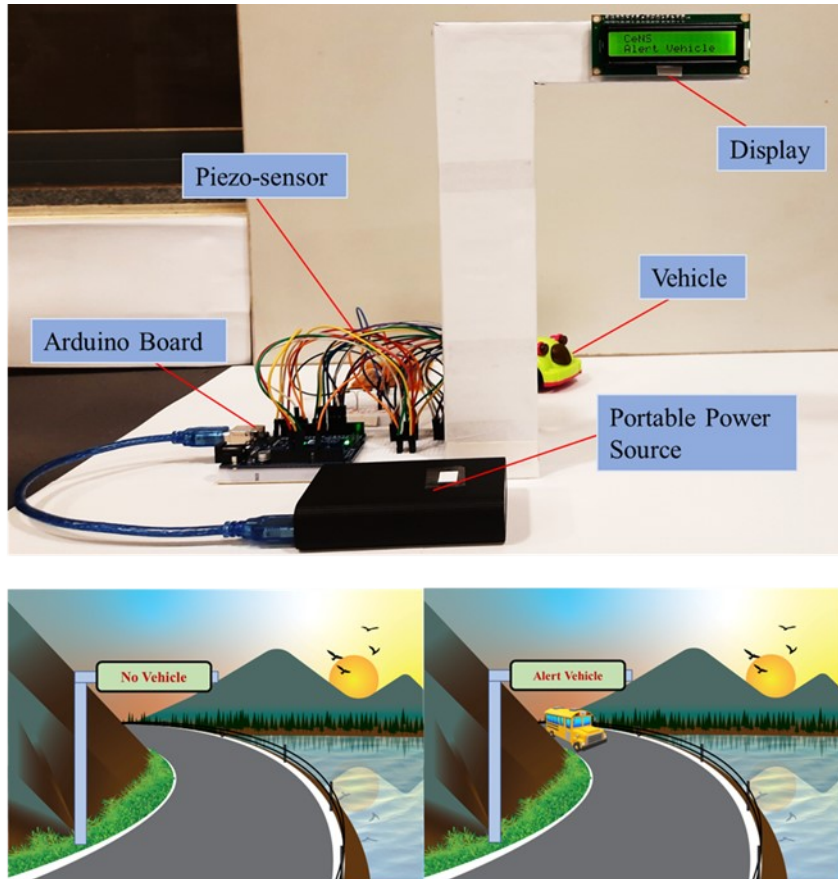

Figure S14. Programming code for road safety system with lab scale setup of alert display operated by piezo-sensor. Schematic of the real-time application of piezo sensor at the dangerous turning points of mountains to avoid accidents.



## Supplementary file number –S15

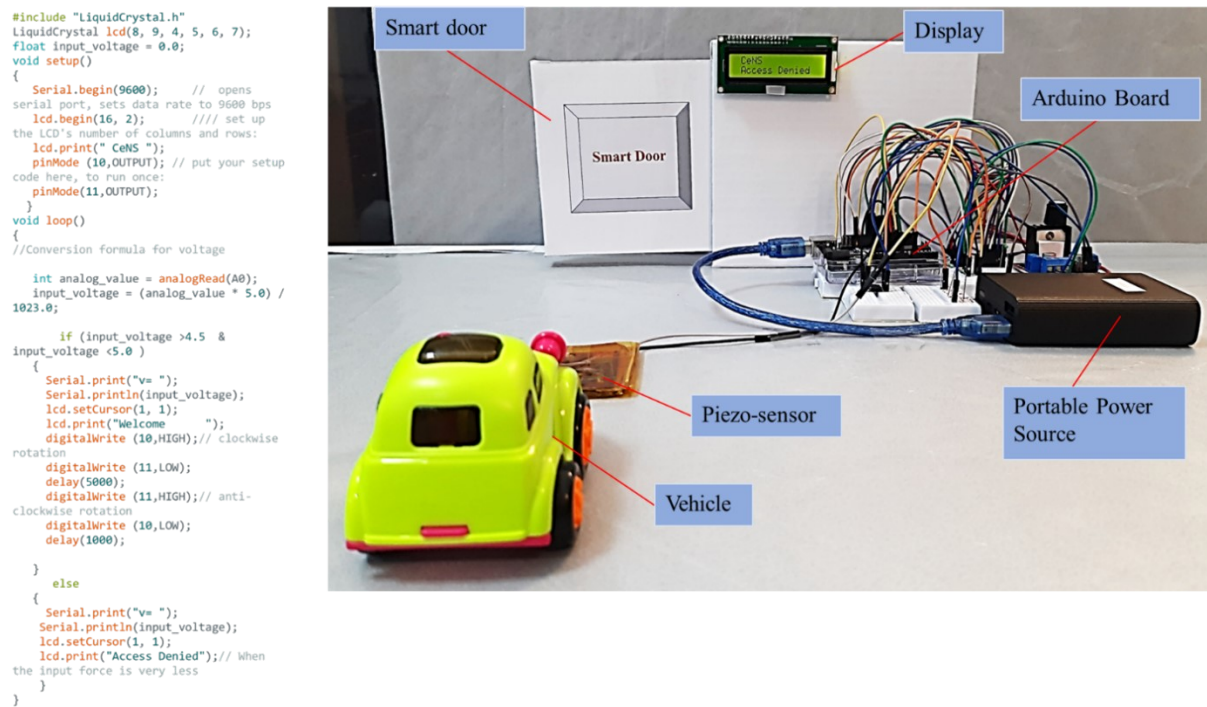

Figure S15. Programme coding and lab scale setup of smart door operated by piezo-sensor with well labelled.

## **Supplementary file number –S16**

### S.16 Supplementary Movies

ESI Movie 1. LEDs glowing

ESI Movie 2. LCD powered by the prototype

ESI Movie 3. Capacitor charging by prototype

ESI Movie 4. Heel tapping

ESI Movie 5. Toe-tapping

ESI Movie 6. Road safety sensor demonstration

ESI Movie 7. Smart door controlled by prototype as pressure sensor demonstration
